# Supplementary material for: Ligilactobacillus murinus Strains Isolated from Mice Intestinal Tract: Molecular Characterization and Antagonistic Activity against Food-Borne Pathogens
Source: MDPI journal article supplement (doi:10.3390/microorganisms11040942), 2023-04-04
Supplement: s1 [file s1]

## Supplementary Materials

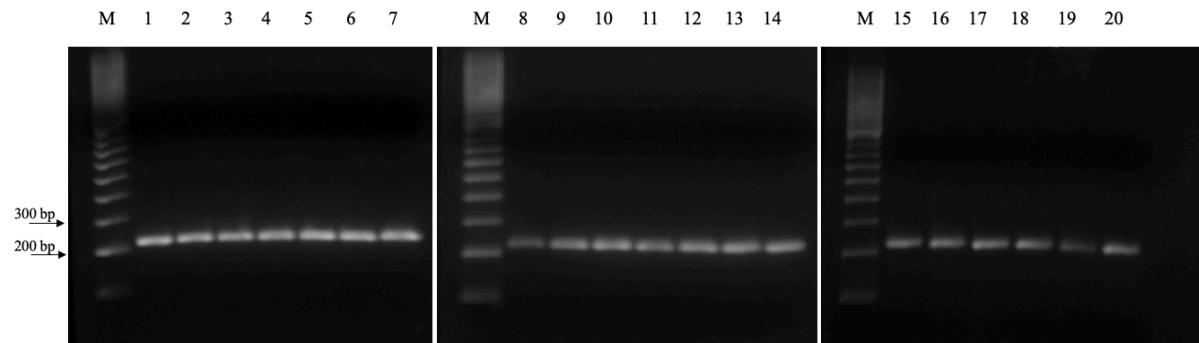

**Figure S1.** Products obtained through PCR with *Ligilactobacillus animalis* primers for the 18 LAB strains isolated A1, A2, B1, C1, D1, E1, E2, E3, E4, E5, F1, F2, F3, G1, H1, H2, H3 and I1 (lanes 1-18), *Lactococcus lactis* (line 19) and *Lactocaseibacillus rhamnosus* controls (lane 20), GeneRuler™ DNA Ladder Mix as standard of molecular weight (M).

**Table S1.** Molecular identification (BLAST-NCBI) of isolated LAB strains from mice intestinal tract.

| Strain    | Description                                                      | Query Cover | E value       | Per Ident   | GenBank Accession |
|-----------|------------------------------------------------------------------|-------------|---------------|-------------|-------------------|
| A1        | <i>Ligilactobacillus murinus</i> strain 700 16S rRNA gene        | 98%         | 3e-98         | 99.51%      | MT585453.1        |
| A2        | <i>Ligilactobacillus murinus</i> strain 700 16S rRNA gene        | 98%         | 4e-97         | 99.02%      | MT585453.1        |
| B1        | <i>Ligilactobacillus murinus</i> strain 700 16S rRNA gene        | 99%         | 8e-99         | 99.51%      | MT585453.1        |
| C1        | <i>Ligilactobacillus murinus</i> strain 700 16S rRNA gene        | 99%         | 8e-99         | 99.51%      | MT585453.1        |
| <b>D1</b> | <b><i>Ligilactobacillus murinus</i> strain 700 16S rRNA gene</b> | <b>99%</b>  | <b>2e-100</b> | <b>100%</b> | <b>MT585453.1</b> |
| E1        | <i>Ligilactobacillus murinus</i> strain 700 16S rRNA gene        | 99%         | 2e-99         | 99.51%      | MT585453.1        |
| <b>E2</b> | <b><i>Ligilactobacillus murinus</i> strain 700 16S rRNA gene</b> | <b>99%</b>  | <b>5e-101</b> | <b>100%</b> | <b>MT585453.1</b> |
| E3        | <i>Ligilactobacillus murinus</i> strain 700 16S rRNA gene        | 99%         | 8e-99         | 99.51%      | MT585453.1        |
| E4        | <i>Streptococcus salivarius</i> strain1957 16S rRNA gene         | 99%         | 1e-91         | 97.54%      | MT597770.1        |
| E5        | <i>Ligilactobacillus murinus</i> strain 700 16S rRNA gene        | 99%         | 2e-94         | 98.07%      | MT585453.1        |
| F1        | <i>Ligilactobacillus murinus</i> strain 700 16S rRNA gene        | 100%        | 8e-99         | 99.51%      | MT585453.1        |
| F2        | <i>Ligilactobacillus murinus</i> strain 700 16S rRNA gene        | 99%         | 1e-96         | 99.02%      | MT585453.1        |
| F3        | <i>Ligilactobacillus murinus</i> strain 700 16S rRNA gene        | 94%         | 6E-85         | 97.89%      | MT585453.1        |
| <b>G1</b> | <b><i>Ligilactobacillus murinus</i> strain 700 16S rRNA gene</b> | <b>100%</b> | <b>8e-99</b>  | <b>100%</b> | <b>MT585453.1</b> |
| H1        | <i>Ligilactobacillus murinus</i> strain 700 16S rRNA gene        | 99%         | 3E-98         | 99.51%      | MT585453.1        |
| H2        | <i>Ligilactobacillus animalis</i> strain 8372 16S rRNA gene      | 99%         | 4e-82         | 95.10%      | MT5389999.1       |
| H3        | <i>Ligilactobacillus murinus</i> strain 700 16S rRNA gene        | 98%         | 3e-98         | 99.51%      | MT585453.1        |
| I1        | <i>Ligilactobacillus murinus</i> strain 700 16S rRNA gene        | 99%         | 4e-97         | 99.02%      | MT585453.1        |
